# Supplementary material for: Preparation of polyurea microcapsules containing phase change materials in a rotating packed bed
Source: Royal Society of Chemistry journal article supplement (doi:10.1039/c7ra01805c), 2017-01-01
Supplement: c7ra01805c1.pdf [file c7ra01805c1.pdf]

## Electronic supplementary information

The actual centrifugal acceleration ( $a$ ) was calculated according to formula S (1) and S (2)

$$a = r \times \omega^2 \quad (\text{S1})$$

$$\omega = \frac{2\pi N}{60} \text{rad/s} \quad (\text{S2})$$

where  $r$  is the mean inner diameter of the casing (75 mm), and  $N$  is the rotational speed (rpm).

When  $N$  is 600 rpm, 900 rpm, 1200 rpm, 1500 rpm and 1800 rpm respectively, the corresponding  $a$  is 295.8 m/s<sup>2</sup>, 665.5 m/s<sup>2</sup>, 1183.2 m/s<sup>2</sup>, 1848.7 m/s<sup>2</sup>, and 2662.1 m/s<sup>2</sup>, respectively.

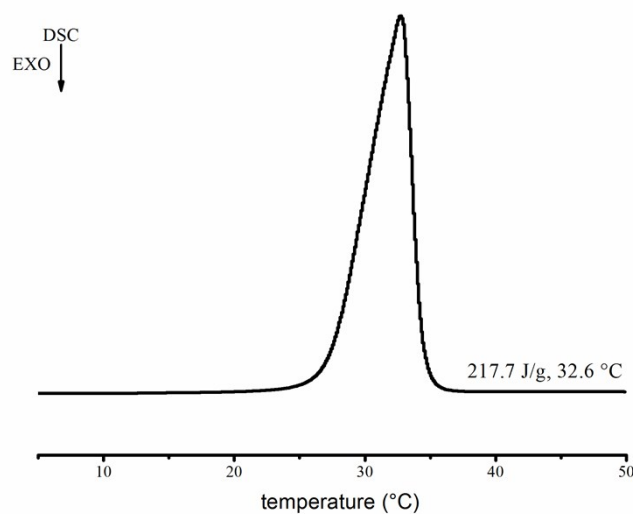

Figure S1 DSC curve of PCM

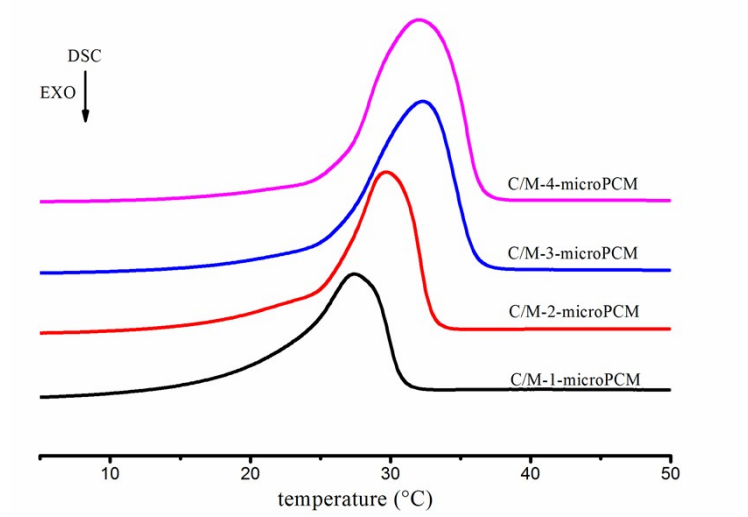

Figure S2 DSC curves of microPCMs with different C/M

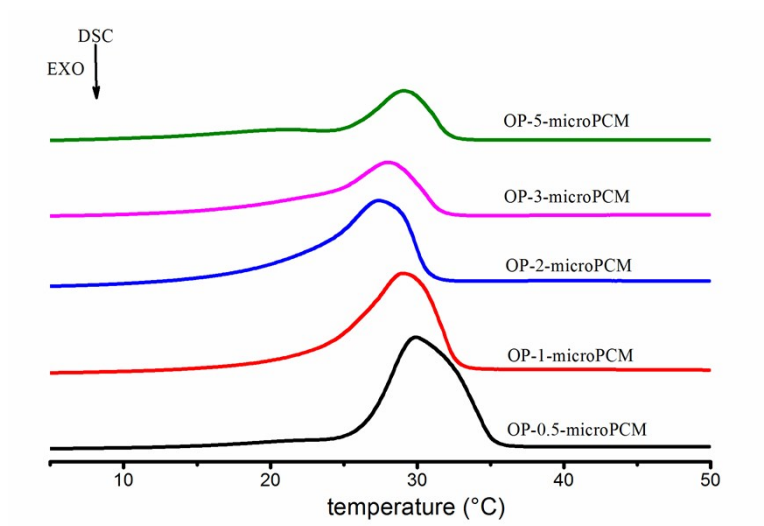

Figure S3 DSC curves of microPCMs with different emulsifier dosage

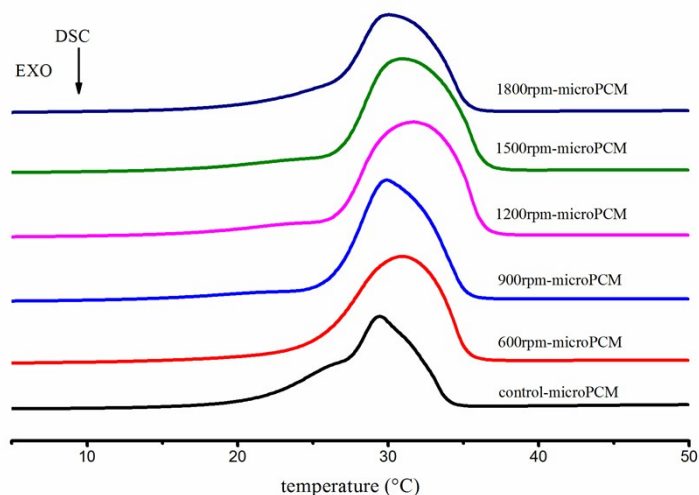

Figure S4 DSC curves of control microPCM and microPCMs prepared at different N in RPB

Table S1 comparison between RPB and other reactors in microencapsulation of PCMs

| Reactors                                                                                                  | Shell materials       | PCMs                        | Preparation time (min) | Reaction temperature (°C) | Highest $\Delta H_{fus}$ (J/g) | Highest $C_d/E$ % | Morphology of microcapsules                        | References          |
|-----------------------------------------------------------------------------------------------------------|-----------------------|-----------------------------|------------------------|---------------------------|--------------------------------|-------------------|----------------------------------------------------|---------------------|
| RPB                                                                                                       | Polyurea              | Paraffin                    | 6                      | 25                        | 105.59                         | 48.5/97           | Compact and smooth surfaces                        | This work           |
| 500ml beaker with a mechanical stirrer                                                                    | Polyurea              | Paraffin                    | 60                     | 25                        | 84.5                           | 38.8/77.6         | rough surfaces                                     | This work           |
| round-bottom flask with a QSL high-speed disperse-machine                                                 | polyurea              | paraffin                    | 240                    | 60                        | 92.5                           | 44.5/-            | spherical shape with a coarse surface              | (2016) <sup>1</sup> |
| a beaker with a magnetic stirrer                                                                          | Polyurea              | n-octadecane                | 150                    | 35°C-30min<br>55°C-120min | 170.4                          | -/99.6            | spherical and the surface is dented                | (2015) <sup>2</sup> |
| a 250 ml three-neck round-bottomed flask with a mechanical stirrer                                        | polyurea/polyurethane | butyl stearate and paraffin | 180                    | 60                        | 82.62                          | 60/-              | relatively spherical profiles and compact surfaces | (2013) <sup>3</sup> |
| conventional reactor with a mechanical stirrer                                                            | polyurea              | n-octadecane                | 180                    | 50                        | 54.9                           | 23.7/-            | many microcapsules were damaged                    | (2012) <sup>4</sup> |
| 500-mL beaker with a mechanical stirrer                                                                   | Polyurea/polyurethane | butyl stearate              | 255                    | 70                        | 85                             | -/95              | smooth and compact surface                         | (2011) <sup>5</sup> |
| 250-mL beaker with a high shear mechanical stirrer consisting of a mesh plate encasing the stirrer blades | polyurea              | n-octadecane                | 90                     | 60                        | -                              | 70/92             | round and regular                                  | (2007) <sup>6</sup> |
| conventional reactor with a mechanical stirrer                                                            | polyurea              | octadecane                  | 120                    | 25                        | 117.5                          | -/94.7            | Smooth and regular                                 | (2006) <sup>7</sup> |

## References

1. S. P. Zhan, S. H. Chen, L. Chen and W. M. Hou. Powder Technology, 2016, **292**: 217-222.
2. Q. Wu, D. Zhao, X. Jiao, Y. Zhang, K. J. Shea, X. Lu and G. Qiu. Industrial & Engineering Chemistry Research, 2015, **54**: 8130-8136.
3. Y. Ma, X. Chu, G. Tang and Y. Yao. Journal of colloid and interface science, 2013, **392**: 407-414.
4. W. Li, X. Zhang, X. Wang, G. Tang and H. Shi. Energy, 2012, **38**: 249-254.
5. S. Lu, J. Xing, Z. Zhang and G. Jia. Journal of Applied Polymer Science, 2011, **121**: 3377-3383.
6. P. Siddhan, M. Jassal and A. K. Agrawal. Journal of Applied Polymer Science, 2007, **106**: 786–792.
7. J. F. Su, L. X. Wang, L. Ren, Z. Huang and X. W. Meng. Journal of Applied Polymer Science, 2006, **102**: 4996-5006.
